# Supplementary material for: Prevalence of oropharyngeal dysphagia in geriatric patients and real-life associations with diseases and drugs
Source: PubMed Central journal article supplement (PMC8578645; doi:10.1038/s41598-021-99858-w), 2021-11-09
Supplement: 41598_2021_99858_MOESM1_ESM.pdf [file 41598_2021_99858_MOESM1_ESM.pdf]

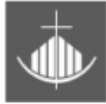

# Klinik für Geriatrie

## Klinische Schluckuntersuchung

| 1. Anamnese                |                                            |                                             |                                            |
|----------------------------|--------------------------------------------|---------------------------------------------|--------------------------------------------|
| Diagnose                   |                                            |                                             |                                            |
| Krankheitsbeginn:          |                                            |                                             |                                            |
| Beginn der Schluckstörung: |                                            |                                             |                                            |
| Zahnstatus:                | <input type="checkbox"/> intakt            | <input type="checkbox"/> schlechte Zähne    | <input type="checkbox"/> Vollprothese      |
| Bisherige Diagnostik:      | <input type="checkbox"/> klin. Schlucktest | <input type="checkbox"/> Rhinolaryngoskopie | <input type="checkbox"/> Videofluoroskopie |
| Pneumonie:                 | <input type="checkbox"/> ja                | <input type="checkbox"/> nein               | Datum                                      |
| COPD:                      | <input type="checkbox"/> ja                | <input type="checkbox"/> nein               |                                            |

| 2. Beeinträchtigung der Untersuchbarkeit |                                     |                                        |                                        |                                       |
|------------------------------------------|-------------------------------------|----------------------------------------|----------------------------------------|---------------------------------------|
| Pat. untersuchbar/koop:                  | <input type="checkbox"/> ja         | <input type="checkbox"/> tlw.          | <input type="checkbox"/> nein          |                                       |
| Quant. Bewusstseinsstörung:              | <input type="checkbox"/> wach       | <input type="checkbox"/> somnolent     | <input type="checkbox"/> soporös       | <input type="checkbox"/> komatös      |
| Qual. Bewusstseinsstörung:               | <input type="checkbox"/> orientiert | <input type="checkbox"/> unruhig       | <input type="checkbox"/> desorientiert | <input type="checkbox"/> antriebsarm  |
| Motorische Funktion:                     | <input type="checkbox"/> gehfähig   | <input type="checkbox"/> Rollst. mobil | <input type="checkbox"/> Bett mobil    | <input type="checkbox"/> bettlägerig  |
| Kognition/Verhalten:                     | <input type="checkbox"/> Neglect    | <input type="checkbox"/> Aphasie       | <input type="checkbox"/> Dysarthrie    | <input type="checkbox"/> kogn. Beein. |
| Äußere ungünstige Einflüsse              | <input type="checkbox"/> Lage       | <input type="checkbox"/> Medi.         | <input type="checkbox"/> Tubus         | <input type="checkbox"/> Tracheost.   |

| 3. Klinische Testung                             |                               |                          |                          |                     |                          |                          |                          |
|--------------------------------------------------|-------------------------------|--------------------------|--------------------------|---------------------|--------------------------|--------------------------|--------------------------|
| Klinische Testung                                | Hinweis auf Funktionsstörung? | nein                     | ja                       | Schluckversuch      | Hinweis auf Aspiration?  | nein                     | Ja                       |
| Facio-orale motorische Funktionen (HN V VII XII) | a) Faziale Parese             | <input type="checkbox"/> | <input type="checkbox"/> | 10 ml               | a) Husten                | <input type="checkbox"/> | <input type="checkbox"/> |
|                                                  | b) Zungenschwäche             | <input type="checkbox"/> | <input type="checkbox"/> |                     | b) Räuspern              | <input type="checkbox"/> | <input type="checkbox"/> |
|                                                  | c) Zungenbewegungsstörung     | <input type="checkbox"/> | <input type="checkbox"/> |                     | c) Reduz. Hustenstoß     | <input type="checkbox"/> | <input type="checkbox"/> |
|                                                  | d) gestörte Kaufunktion       | <input type="checkbox"/> | <input type="checkbox"/> |                     | d) Nachschlucken         | <input type="checkbox"/> | <input type="checkbox"/> |
|                                                  |                               |                          |                          |                     |                          | e) Stimmveränderung      | <input type="checkbox"/> |
| Facio-orale sensible Funktionen (HN V)           | a) Lippen reduziert           | <input type="checkbox"/> | <input type="checkbox"/> | 20 ml               | a) Husten                | <input type="checkbox"/> | <input type="checkbox"/> |
|                                                  | b) Wangeninnenseite reduziert | <input type="checkbox"/> | <input type="checkbox"/> |                     | b) Räuspern              | <input type="checkbox"/> | <input type="checkbox"/> |
|                                                  | c) Zunge reduziert            | <input type="checkbox"/> | <input type="checkbox"/> |                     | c) Reduz. Hustenstoß     | <input type="checkbox"/> | <input type="checkbox"/> |
|                                                  |                               |                          |                          | d) Nachschlucken    | <input type="checkbox"/> | <input type="checkbox"/> |                          |
|                                                  |                               |                          |                          | e) Stimmveränderung | <input type="checkbox"/> | <input type="checkbox"/> |                          |

|                                                |                                   |                          |                          |                     |                             |                          |                          |
|------------------------------------------------|-----------------------------------|--------------------------|--------------------------|---------------------|-----------------------------|--------------------------|--------------------------|
| Inspektion Mundhöhle                           | a) Speichelaustritt Mund          | <input type="checkbox"/> | <input type="checkbox"/> | 40 ml               | a) Husten                   | <input type="checkbox"/> | <input type="checkbox"/> |
|                                                | b) Speichelresiduen               | <input type="checkbox"/> | <input type="checkbox"/> |                     | b) Räuspern                 | <input type="checkbox"/> | <input type="checkbox"/> |
|                                                | c) Essensreste                    | <input type="checkbox"/> | <input type="checkbox"/> |                     | c) Reduz. Hustenstoß        | <input type="checkbox"/> | <input type="checkbox"/> |
|                                                |                                   |                          |                          | d) Nachschlucken    | <input type="checkbox"/>    | <input type="checkbox"/> |                          |
|                                                |                                   |                          |                          | e) Stimmveränderung | <input type="checkbox"/>    | <input type="checkbox"/> |                          |
| Sensomotorische pharyngo-laryngeale Funktionen | a) abnorm. willk. Husten          | <input type="checkbox"/> | <input type="checkbox"/> | 90 ml               | a) Husten                   | <input type="checkbox"/> | <input type="checkbox"/> |
|                                                | b) abnorm. Würgereflex            | <input type="checkbox"/> | <input type="checkbox"/> |                     | b) Erstickungsanfälle       | <input type="checkbox"/> | <input type="checkbox"/> |
|                                                | c) Gaumensegelhebung gestört      | <input type="checkbox"/> | <input type="checkbox"/> |                     | c) veränderte Stimmqualität | <input type="checkbox"/> | <input type="checkbox"/> |
|                                                | d) Dysphonie                      | <input type="checkbox"/> | <input type="checkbox"/> |                     | d) Abbruch                  | <input type="checkbox"/> | <input type="checkbox"/> |
|                                                | e) beeinträchtigte Laryxelevation | <input type="checkbox"/> | <input type="checkbox"/> |                     |                             |                          |                          |

| 4. Graduierung                |                                                  |                                                    |                                                                           |                                                                          |                                                                          |
|-------------------------------|--------------------------------------------------|----------------------------------------------------|---------------------------------------------------------------------------|--------------------------------------------------------------------------|--------------------------------------------------------------------------|
| Diagnose:                     |                                                  |                                                    |                                                                           |                                                                          |                                                                          |
| Grad                          | <input type="checkbox"/> 0<br>keine<br>Dysphagie | <input type="checkbox"/> 1<br>leichte<br>Dysphagie | <input type="checkbox"/> 2<br>mittelschwere<br>Dysphagie                  | <input type="checkbox"/> 3<br>schwere<br>Dysphagie                       | <input type="checkbox"/> 4<br>massive<br>Dysphagie                       |
| Penetrations/Aspirationsskala | <input type="checkbox"/> 1                       | <input type="checkbox"/> 2<br>(Penetration)        | <input type="checkbox"/> 3<br><input type="checkbox"/> 4<br>(Penetration) | <input type="checkbox"/> 5<br><input type="checkbox"/> 6<br>(Aspiration) | <input type="checkbox"/> 7<br><input type="checkbox"/> 8<br>(Aspiration) |

| 5. Ernährungsplanung               |                                      |                                                                            |                                                                                 |                                                       |                                     |
|------------------------------------|--------------------------------------|----------------------------------------------------------------------------|---------------------------------------------------------------------------------|-------------------------------------------------------|-------------------------------------|
| Ernährungsplang.<br>Essen          | <input type="checkbox"/> Normalkost  | <input type="checkbox"/> weiche Kost                                       | <input type="checkbox"/> Dysph.- kost<br><input type="checkbox"/> fein-passiert | <input type="checkbox"/> Nahrung<br>< 50% oral        | <input type="checkbox"/> 100% Sonde |
| Ernährungsplang.<br>Trinken        | <input type="checkbox"/> flüssig     | <input type="checkbox"/> flüssig<br><input type="checkbox"/> eingeschränkt | <input type="checkbox"/> angedickt                                              | <input type="checkbox"/> Trinken<br>< 50% oral        | <input type="checkbox"/> 100% Sonde |
| Medikamente                        | <input type="checkbox"/> alle        | <input type="checkbox"/> nicht flüssig                                     | <input type="checkbox"/> gemörsert<br>mit Brei                                  | <input type="checkbox"/> gemörsert<br>< 50 % oral     | <input type="checkbox"/> 100% Sonde |
| Sonde                              | <input type="checkbox"/> keine Sonde | <input type="checkbox"/> angepasst                                         | <input type="checkbox"/> NGS                                                    | <input type="checkbox"/> PEG/PEJ                      | <input type="checkbox"/> i.v.       |
| 6. Diagnostik- und Therapieplanung |                                      |                                                                            |                                                                                 |                                                       |                                     |
| Diagnostik                         | <input type="checkbox"/> keine       | <input type="checkbox"/> erneuter klin.<br>Schlucktest                     | <input type="checkbox"/> FEES (Rhino-<br>laryngoskopie)                         | <input type="checkbox"/> VFS (Video-<br>fluoroskopie) |                                     |
| Therapie                           | <input type="checkbox"/> keine       | <input type="checkbox"/> kompens.                                          | <input type="checkbox"/> restituierend                                          | <input type="checkbox"/> adaptierend                  |                                     |

Supplementary above [17], Source: Department of Geriatrics and Geriatric Day Clinic, Diakonie Hospital, Diakoniewerk Halle (Saale), Germany

Examination protocol of the applied Standardized Clinical Swallowing Assessment for OD screening adapted according to Stanschus [14, 15] including the Daniels' criteria [16] for OD grading 0-4.

## Prevalence of oropharyngeal dysphagia in geriatric patients and real-life associations with diseases and drugs

Supplementary Information
